# Supplementary material
Source: PubMed Central journal article supplement (PMC8647596)

CT

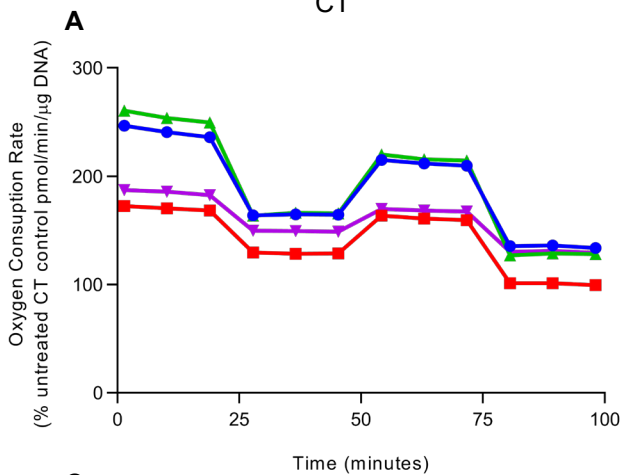

SCT

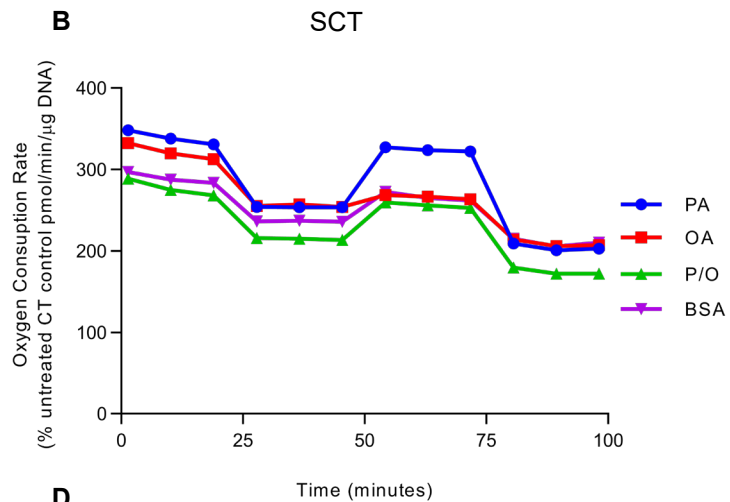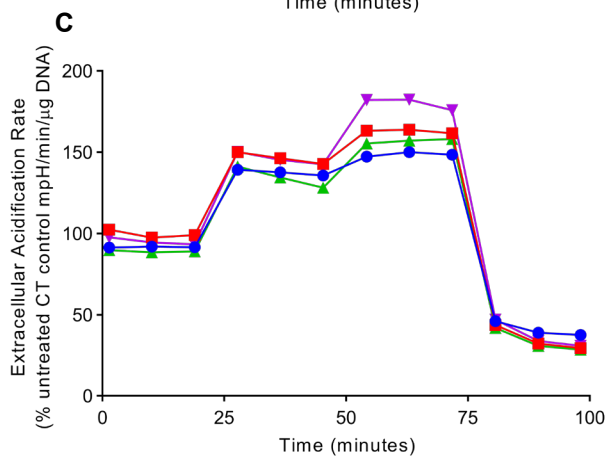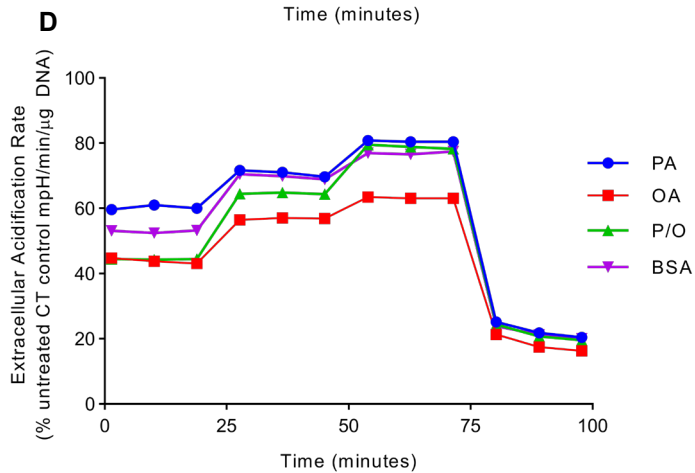

Supplement: NIHMS1648877-supplement-03.pdf [file NIHMS1648877-supplement-03.pdf]

**A**

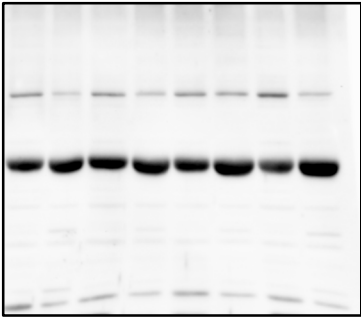

**B**

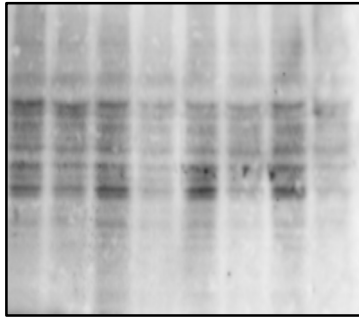

Supplement: NIHMS1648877-supplement-04.pdf [file NIHMS1648877-supplement-04.pdf]

**A**

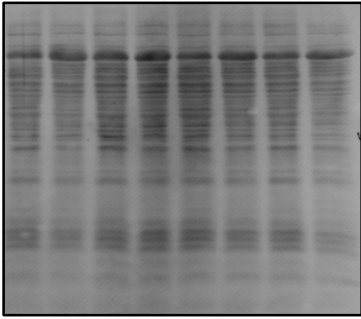

**B**

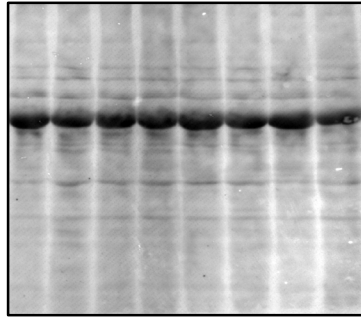

**C**

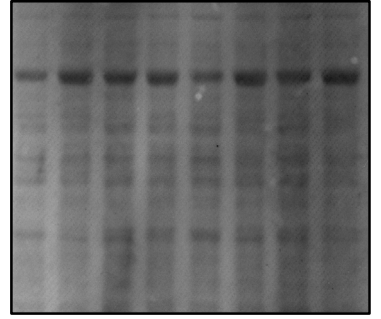

**D**

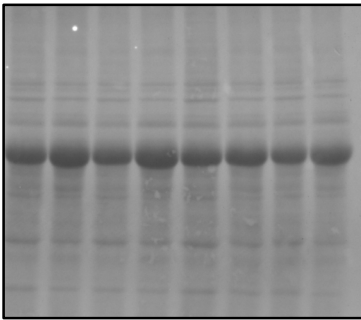

**E**

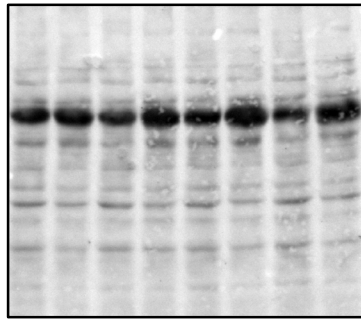

**F**

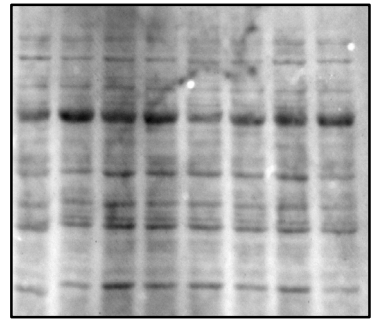

**G**

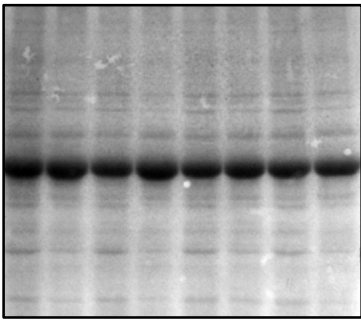

**H**

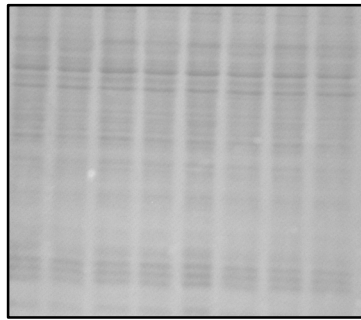

Supplement: NIHMS1648877-supplement-05.pdf [file NIHMS1648877-supplement-05.pdf]
